# Supplementary material for: A panel of eight microRNAs is a good predictive parameter for triple-negative breast cancer relapse
Source: PubMed Central journal article supplement (PMC7392022; doi:10.7150/thno.46142), 2020-07-09
Supplement: thnov10p8771s1.pdf [file thnov10p8771s1.pdf]

## Supporting Information

### **Title: A panel of eight microRNAs is a good predictive parameter for triple-negative breast cancer relapse**

Hsiao-Chin Hong<sup>1,2\*</sup>, Cheng-Hsun Chuang<sup>3,5\*</sup>, Wei-Chih Huang<sup>4,5,6</sup>, Shun-Long Weng<sup>7,8,9</sup>, Chia-Hung Chen<sup>10</sup>, Kuang-Hsin Chang<sup>4,5</sup>, Kuang-Wen Liao<sup>3,5,11,12</sup>✉, Hsien-Da Huang<sup>1,2,5</sup>✉

1. Warshel Institute for Computational Biology, The Chinese University of Hong Kong, Shenzhen, Guangdong Province 518172, China
2. School of Life and Health Sciences, The Chinese University of Hong Kong, Shenzhen, Guangdong Province 518172, China
3. Institute of Molecular Medicine and Bioengineering, National Chiao Tung University, Hsinchu City 30068, Taiwan, ROC
4. Institute of Bioinformatics and Systems Biology, National Chiao Tung University, Hsinchu City 30068, Taiwan, ROC
5. Department of Biological Science and Technology, National Chiao Tung University, Hsinchu City 30068, Taiwan, ROC
6. Come True Biomedical Inc., Taichung 408, Taiwan, ROC
7. Department of Obstetrics and Gynecology, Hsinchu MacKay Memorial Hospital, Hsinchu City 300, Taiwan, ROC
8. Department of Medicine, MacKay Medical College, New Taipei City 252, Taiwan, ROC
9. MacKay Junior College of Medicine, Nursing and Management College, Taipei City 112, Taiwan, ROC
10. Department of Medical Research, Hsinchu Mackay Memorial Hospital, Hsinchu City 30071, Taiwan, ROC
11. Center for Intelligent Drug Systems and Smart Bio-Devices, National Chiao Tung University, Hsinchu City 30068, Taiwan, ROC
12. Graduate Institute of Medicine, College of Medicine, Kaohsiung Medical University, Kaohsiung 80708, Taiwan, ROC

\*These authors contributed equally to this work.

✉ Corresponding authors: **Kuang-Wen Liao, Ph.D.**, National Chiao Tung University, 75 Bo-Ai Street, Hsinchu, 300, Taiwan; Email: [liaoams@mail.nctu.edu.tw](mailto:liaoams@mail.nctu.edu.tw); TEL: +886-3-5729287 ext. 56955. **Hsien-Da Huang, Ph.D.**, The Chinese University of Hong Kong, Shenzhen, H.L. Tu Building, 2001 Longxiang Blvd., Longgang District, Shenzhen, China 518172. Email: [huanghsienda@cuhk.edu.cn](mailto:huanghsienda@cuhk.edu.cn); TEL: +86 (0) 755 2351 9601.

**Table S1.** Area under the ROC curve for individual miRNAs from the TCGA\_TNBC and GEOD-40525 datasets between adjacent normal and TNBC tissue samples.

| <b>Model set</b>   | <b>TCGA_TNBC</b> | <b>p-value</b> | <b>GEOD-40525</b> | <b>p-value</b> |
|--------------------|------------------|----------------|-------------------|----------------|
| <b>miR-139-5p</b>  | 0.9959           | <0.0001        | 0.9464            | 0.003830       |
| <b>miR-10b-5p</b>  | 0.9968           | <0.0001        | 0.9643            | 0.002635       |
| <b>miR-486-5p</b>  | 0.9217           | <0.0001        | 0.9821            | 0.001790       |
| <b>miR-455-3p</b>  | 0.9145           | <0.0001        | 0.9107            | 0.007799       |
| <b>miR-324-5p</b>  | 0.8665           | 0.0005449      | 0.9464            | 0.003830       |
| <b>miR-142-3p</b>  | 0.8504           | 0.0009443      | 0.9107            | 0.007799       |
| <b>miR-146b-5p</b> | 0.7553           | 0.01595        | 0.9286            | 0.005499       |
| <b>miR-107</b>     | 0.8194           | 0.002574       | 0.9286            | 0.005499       |
| <b>miR-20a-5p</b>  | 0.8323           | 0.001682       | 0.875             | 0.01512        |
| <b>miR-17-5p</b>   | 0.9135           | <0.0001        | 0.9643            | 0.002635       |

**Table S2.** Area under the ROC curve for seven and eight miRNAs from three public datasets between patients with TNBC recurrence and no recurrence.

| TCGA_TNBC in training set |        |                                                                      |           |
|---------------------------|--------|----------------------------------------------------------------------|-----------|
| Model set                 | Number | miRNA combinations                                                   | AUC       |
| Model_1                   | 7      | RNR~miR-139+miR-10b+miR-486+miR-107+miR-324+miR-455+miR-146b         | 0.7560847 |
| Model_2                   | 7      | RNR~miR-139+miR-10b+miR-486+miR-107+miR-324+miR-455+miR-20a          | 0.7846561 |
| Model_3                   | 7      | RNR~miR-139+miR-10b+miR-486+miR-107+miR-324+miR-146b+miR-20a         | 0.7481481 |
| Model_4                   | 7      | RNR~miR-139+miR-10b+miR-486+miR-107+miR-455+miR-146b+miR-20a         | 0.8005291 |
| Model_5                   | 7      | RNR~miR-139+miR-10b+miR-486+miR-324+miR-455+miR-146b+miR-20a         | 0.7724868 |
| Model_6                   | 7      | RNR~miR-139+miR-10b+miR-107+miR-324+miR-455+miR-146b+miR-20a         | 0.8015873 |
| Model_7                   | 7      | RNR~miR-139+miR-486+miR-107+miR-324+miR-455+miR-146b+miR-20a         | 0.7994709 |
| Model_8                   | 7      | RNR~miR-10b+miR-486+miR-107+miR-324+miR-455+miR-146b+miR-20a         | 0.7402116 |
| Model_9                   | 8      | RNR~miR-139+miR-10b+miR-486+miR-107+miR-324+miR-455+miR-146b+miR-20a | 0.8031746 |

**Table S3.** The annotation of 8 miRNAs in TNBC by previous experimental studies (UP: Upregulation; DOWN: Downregulation).

| <b>Name</b>        | <b>Functional role in TNBC</b>                         | <b>Expression level</b> | <b>Suppl. Ref.</b> |
|--------------------|--------------------------------------------------------|-------------------------|--------------------|
| <b>miR-139-5p</b>  | metastasis                                             | DOWN                    | [1, 2]             |
| <b>miR-10b-5p</b>  | chemoresistance, metastasis                            | DOWN                    | [3-6]              |
| <b>miR-486-5p</b>  | immunomodulatory tumor suppressor                      | DOWN                    | [7-9]              |
| <b>miR-107</b>     | metastasis, correlated with relapse                    | UP/DOWN                 | [6, 10-13]         |
| <b>miR-455-3p</b>  | migration, invasion                                    | UP                      | [14]               |
| <b>miR-146b-5p</b> | proliferation, homologous recombination                | UP                      | [15]               |
| <b>miR-20a-5p</b>  | migration, invasion, growth                            | UP                      | [16, 17]           |
| <b>miR-324-5p</b>  | anti-apoptosis potential, associated with decreased OS | UP                      | [6, 18]            |

Suppl. Ref.: Supplementary reference.

**Table S4.** Gene Ontology and Hallmark pathways correlated with high-risk groups of TNBC patients.

| Function     | Enrichment pathway               | Count | NES     | p.adjust | P value     | GeneRatio | Enrichment ratio |
|--------------|----------------------------------|-------|---------|----------|-------------|-----------|------------------|
| Inflammation | LYMPHOCYTE_ACTIVATION            | 303   | 1.93379 | 0.25821  | 0.004081633 | 0.12228   | 71.64629866      |
| Inflammation | LEUKOCYTE_CELL_CELL_ADHESION     | 221   | 1.936   | 0.2802   | 0.004040404 | 0.09258   | 39.61300356      |
| Inflammation | LEUKOCYTE_DIFFERENTIATION        | 251   | 1.93784 | 0.31003  | 0.00203252  | 0.07125   | 34.65389229      |
| Metastasis   | EXTERNAL_SIDE_OF_PLASMA_MEMBRANE | 183   | 1.95803 | 0.32262  | 0.001937985 | 0.08345   | 29.90084072      |
| Inflammation | COMPLEMENT                       | 182   | 1.48655 | 0.40359  | 0.075630255 | 0.10656   | 28.8293008       |
| Metastasis   | KRAS_SIGNALING_UP                | 182   | 1.59315 | 0.28684  | 0.016806724 | 0.09281   | 26.91051697      |
| Inflammation | LYMPHOCYTE_DIFFERENTIATION       | 179   | 2.01852 | 0.29419  | 0           | 0.06981   | 25.2244697       |
| Inflammation | ALLOGRAFT_REJECTION              | 186   | 1.62    | 0.485    | 0.105       | 0.08315   | 25.05387573      |
| Inflammation | TNFA_SIGNALING_VIA_NFKB          | 197   | 1.61503 | 0.33709  | 0.047325104 | 0.06465   | 20.57029332      |
| Inflammation | INFLAMMATORY_RESPONSE            | 186   | 1.66245 | 0.76161  | 0.043841336 | 0.06179   | 19.10768228      |
| Metastasis   | IL2_STAT5_SIGNALING              | 191   | 1.41526 | 0.41657  | 0.07959183  | 0.06868   | 18.56527928      |
| Metastasis   | APICAL_JUNCTION                  | 184   | 1.2185  | 0.7103   | 0.18292683  | 0.05574   | 12.4972619       |
| Inflammation | T_CELL_DIFFERENTIATION           | 114   | 2.04165 | 0.33226  | 0.002020202 | 0.03301   | 7.684114397      |
| Inflammation | COAGULATION                      | 108   | 1.21138 | 0.6535   | 0.24485597  | 0.05033   | 6.584123092      |
| Inflammation | LEUKOCYTE_PROLIFERATION          | 68    | 1.98195 | 0.35688  | 0.00203252  | 0.02902   | 3.911450876      |
| Inflammation | IL6_JAK_STAT3_SIGNALING          | 80    | 1.47301 | 0.35848  | 0.09445585  | 0.02295   | 2.704315777      |
| Inflammation | THYMOCYTE_AGGREGATION            | 41    | 2.09206 | 0.34731  | 0           | 0.01721   | 1.475770145      |

|              |                      |    |         |         |            |         |             |
|--------------|----------------------|----|---------|---------|------------|---------|-------------|
| Metabolism   | ISOPRENOID_BINDING   | 20 | 1.93921 | 0.34886 | 0          | 0.0183  | 0.70968355  |
| Metastasis   | APICAL_SURFACE       | 41 | 1.39705 | 0.39514 | 0.07581967 | 0.0094  | 0.538509757 |
| Inflammation | MAST_CELL_ACTIVATION | 15 | 1.97202 | 0.32122 | 0          | 0.00662 | 0.19572358  |

---

NES: Normalized enrichment score; GeneRatio = enrichment gene count/total gene count; Enrichment Ratio = NES x GeneRatio

**Table S5.** MiRTarBase and Reactome were analyzed with the 8-miRNA signature.

| Function            | Pathway name                                 | Entities found | Entities total | Entities ratio | Entities p-value | Entities FDR |
|---------------------|----------------------------------------------|----------------|----------------|----------------|------------------|--------------|
| Immune system       | Interleukin-4 and Interleukin-13 signaling   | 21             | 211            | 0.014906394    | 5.64E-08         | 7.73E-05     |
| Cellular response   | Oncogene-induced senescence                  | 13             | 42             | 0.002967149    | 4.76E-06         | 0.003262839  |
| Gene expression     | RUNX3 regulates RUNX1-mediated transcription | 3              | 4              | 2.83E-04       | 2.65E-05         | 0.012106852  |
| Disease             | TGFBR1 KD mutants in cancer                  | 3              | 6              | 4.24E-04       | 8.76E-05         | 0.029961642  |
| Disease             | Loss of function of TGFBR1 in cancer         | 3              | 7              | 4.95E-04       | 1.38E-04         | 0.037732025  |
| Gene expression     | Small interfering RNA (siRNA) biogenesis     | 3              | 9              | 6.36E-04       | 2.87E-04         | 0.065387672  |
| Cellular response   | Cellular senescence                          | 21             | 198            | 0.01398799     | 6.56E-04         | 0.102699039  |
| Cell cycle          | G1 phase                                     | 8              | 48             | 0.003391028    | 6.84E-04         | 0.102699039  |
| Cell cycle          | Cyclin D associated events in G1             | 8              | 48             | 0.003391028    | 6.84E-04         | 0.102699039  |
| Disease             | SMAD4 MH2 domain mutants in cancer           | 2              | 3              | 2.12E-04       | 8.28E-04         | 0.102699039  |
| Disease             | Loss of function of SMAD4 in cancer          | 2              | 3              | 2.12E-04       | 8.28E-04         | 0.102699039  |
| Cellular response   | Oxidative stress-induced senescence          | 13             | 114            | 0.008053691    | 0.00168596       | 0.179245562  |
| Cellular response   | Senescence-associated secretory phenotype    | 8              | 89             | 0.006287531    | 0.001825798      | 0.179245562  |
| Signal transduction | ERBB2 regulates cell motility                | 4              | 19             | 0.001342282    | 0.001847892      | 0.179245562  |



|                     |                                                 |    |     |             |             |             |
|---------------------|-------------------------------------------------|----|-----|-------------|-------------|-------------|
| Gene expression     | Transcriptional regulation by MECP2             | 15 | 100 | 0.007064641 | 0.00218222  | 0.198581976 |
| Signal transduction | Pre-NOTCH transcription and translation         | 10 | 89  | 0.006287531 | 0.002535926 | 0.215553748 |
| Gene expression     | Transcriptional regulation by RUNX3             | 15 | 118 | 0.008336277 | 0.003617939 | 0.279122234 |
| Signal transduction | Downregulation of ERBB4 signaling               | 3  | 10  | 7.06E-04    | 0.003672661 | 0.279122234 |
| Signal transduction | GRB2 events in ERBB2 signaling                  | 4  | 20  | 0.001412928 | 0.004010608 | 0.288763746 |
| Gene expression     | Posttranscriptional silencing by small RNAs     | 2  | 7   | 4.95E-04    | 0.004348557 | 0.29570188  |
| Gene expression     | RUNX3 regulates BCL2L11 (BIM) transcription     | 4  | 6   | 4.24E-04    | 0.005365206 | 0.3421185   |
| Signal transduction | Regulation of PTEN mRNA translation             | 4  | 29  | 0.002048746 | 0.005746118 | 0.3421185   |
| Signal transduction | Regulation of PTEN gene transcription           | 8  | 70  | 0.004945249 | 0.005798619 | 0.3421185   |
| Gene expression     | FOXO-mediated transcription of cell cycle genes | 8  | 27  | 0.001907453 | 0.006153079 | 0.350725501 |
| Gene expression     | MECP2 regulates transcription factors           | 4  | 10  | 7.06E-04    | 0.006561133 | 0.354301187 |

**Table S6.** The clinicopathological characteristics of TNBC patients in the GSE40049, GSE19783 and E-MTAB-1989 datasets for the testing study.

| <b>Dataset</b>                     | <b>GSE40049</b>                     | <b>GSE19783</b>                           | <b>E-MTAB-1989</b>                                           |
|------------------------------------|-------------------------------------|-------------------------------------------|--------------------------------------------------------------|
| <b>Number</b>                      |                                     |                                           |                                                              |
| <b>TNBC</b>                        | 24                                  | 18                                        | 18                                                           |
| <b>Normal</b>                      | 14                                  | 0                                         | 0                                                            |
| <b>Total</b>                       | 38                                  | 18                                        | 18                                                           |
| <b>Age (years)</b>                 | 55.52                               | NA                                        | 54                                                           |
| <b>Preservation type</b>           | Fresh tissue                        | Fresh tissue                              | FFPE                                                         |
| <b>Tumor size</b>                  |                                     | NA                                        | NA                                                           |
| <b>T1-T2</b>                       | 23                                  | -                                         | -                                                            |
| <b>T3-T4</b>                       | 1                                   | -                                         | -                                                            |
| <b>Lymph node metastasis</b>       |                                     | NA                                        | NA                                                           |
| <b>Present</b>                     | 5                                   | -                                         | -                                                            |
| <b>Absent</b>                      | 19                                  | -                                         | -                                                            |
| <b>Number of recurrence events</b> | 7                                   | 7                                         | 10                                                           |
| <b>Median recurrence (years)</b>   | 5.1                                 | 6.8                                       | 2.4                                                          |
| <b>Platform</b>                    | Applied Biosystems SOLiD sequencing | Agilent-019118 Human miRNA Microarray 2.0 | A-AFFY-184 - Affymetrix GeneChip miRNA 2.0 Array [miRNA-2_0] |

FFPE: Formalin-fixed, paraffin-embedded tissue. NA: not available.

**Table S7.** Area under the ROC curve for seven and eight miRNAs from two public datasets (GSE40049 and GSE19783) between patients with TNBC recurrence and no recurrence.

| <b>GSE40049 in the validation set</b> |               |                                                                      |            |
|---------------------------------------|---------------|----------------------------------------------------------------------|------------|
| <b>Model set</b>                      | <b>Number</b> | <b>miRNA combinations</b>                                            | <b>AUC</b> |
| Model_10                              | 7             | RNR~miR-139+miR-10b+miR-486+miR-107+miR-324+miR-455+miR-146b         | 0.9062     |
| Model_11                              | 7             | RNR~miR-139+miR-10b+miR-486+miR-107+miR-324+miR-455+miR-20a          | 0.9062     |
| Model_12                              | 7             | RNR~miR-139+miR-10b+miR-486+miR-107+miR-324+miR-146b+miR-20a         | 0.9062     |
| Model_13                              | 7             | RNR~miR-139+miR-10b+miR-486+miR-107+miR-455+miR-146b+miR-20a         | 0.9062     |
| Model_14                              | 7             | RNR~miR-139+miR-10b+miR-486+miR-324+miR-455+miR-146b+miR-20a         | 0.875      |
| Model_15                              | 7             | RNR~miR-139+miR-10b+miR-107+miR-324+miR-455+miR-146b+miR-20a         | 0.75       |
| Model_16                              | 7             | RNR~miR-139+miR-486+miR-107+miR-324+miR-455+miR-146b+miR-20a         | 0.875      |
| Model_17                              | 7             | RNR~miR-10b+miR-486+miR-107+miR-324+miR-455+miR-146b+miR-20a         | 0.8438     |
| Model_18                              | 8             | RNR~miR-139+miR-10b+miR-486+miR-107+miR-324+miR-455+miR-146b+miR-20a | 0.9062     |

| <b>GSE19783 in the validation set</b> |               |                                                              |            |
|---------------------------------------|---------------|--------------------------------------------------------------|------------|
| <b>Model set</b>                      | <b>Number</b> | <b>miRNA combinations</b>                                    | <b>AUC</b> |
| Model_19                              | 7             | RNR~miR-139+miR-10b+miR-486+miR-107+miR-324+miR-455+miR-146b | 0.7922     |
| Model_20                              | 7             | RNR~miR-139+miR-10b+miR-486+miR-107+miR-324+miR-455+miR-20a  | 0.8831     |
| Model_21                              | 7             | RNR~miR-139+miR-10b+miR-486+miR-107+miR-324+miR-146b+miR-20a | 0.9091     |
| Model_22                              | 7             | RNR~miR-139+miR-10b+miR-486+miR-107+miR-                     | 0.8961     |

|          |   |                                                                      |        |
|----------|---|----------------------------------------------------------------------|--------|
|          |   | 455+miR-146b+miR-20a                                                 |        |
| Model_23 | 7 | RNR~miR-139+miR-10b+miR-486+miR-324+miR-455+miR-146b+miR-20a         | 0.8701 |
| Model_24 | 7 | RNR~miR-139+miR-10b+miR-107+miR-324+miR-455+miR-146b+miR-20a         | 0.8571 |
| Model_25 | 7 | RNR~miR-139+miR-486+miR-107+miR-324+miR-455+miR-146b+miR-20a         | 0.8961 |
| Model_26 | 7 | RNR~miR-10b+miR-486+miR-107+miR-324+miR-455+miR-146b+miR-20a         | 0.8701 |
| Model_27 | 8 | RNR~miR-139+miR-10b+miR-486+miR-107+miR-324+miR-455+miR-146b+miR-20a | 0.8961 |

---

**Figure S1.**

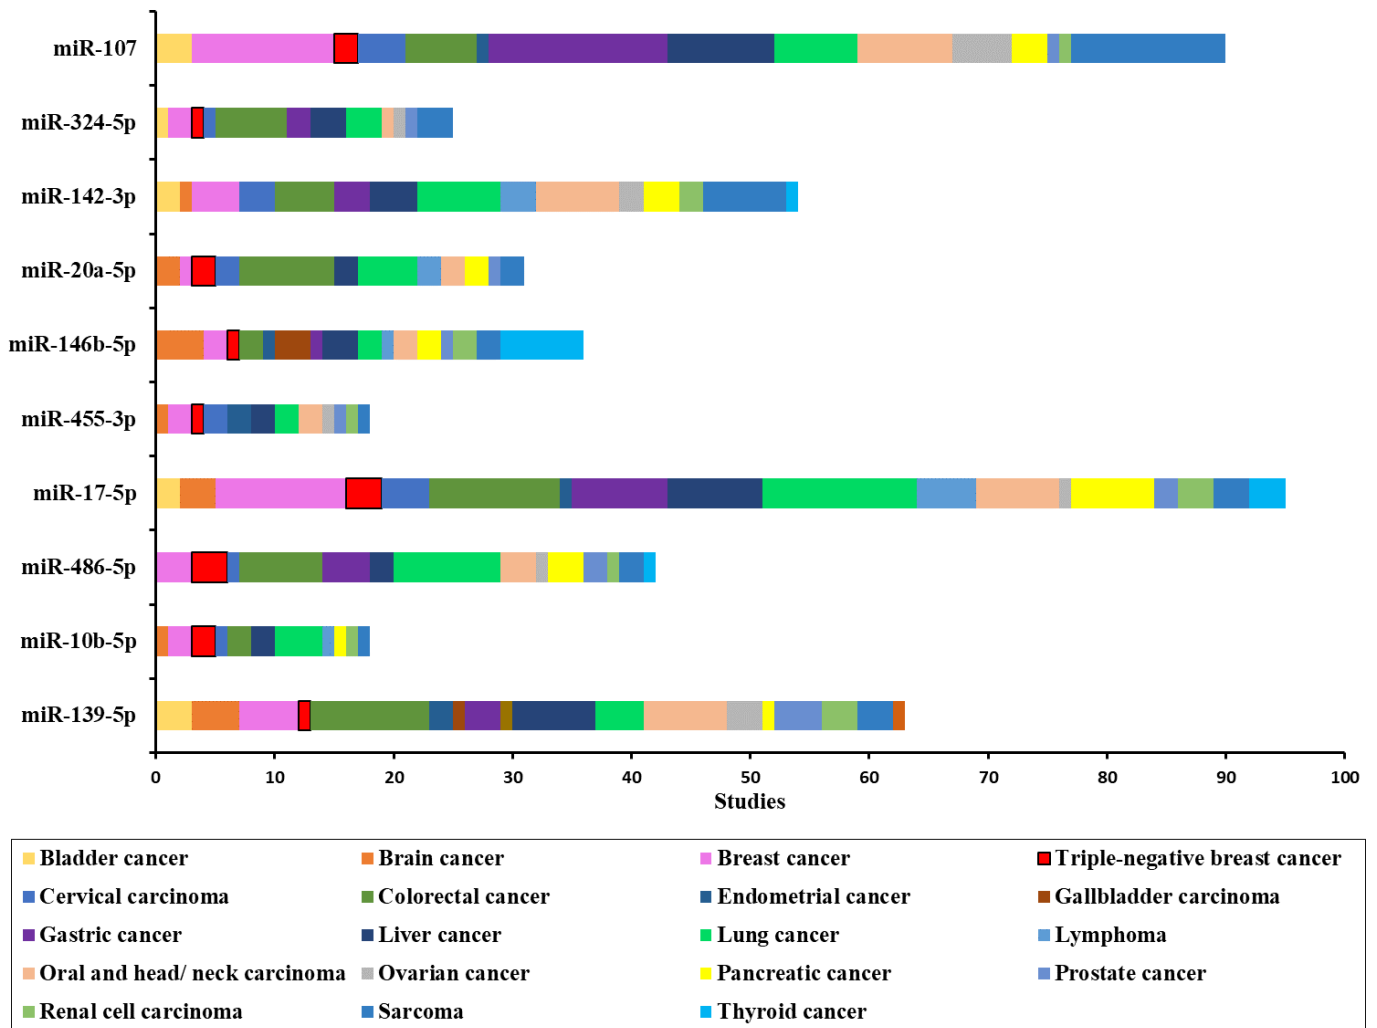

**Figure S1.** A list of the number of publications on several cancer types associated with these 10 miRNAs.

Figure S2.

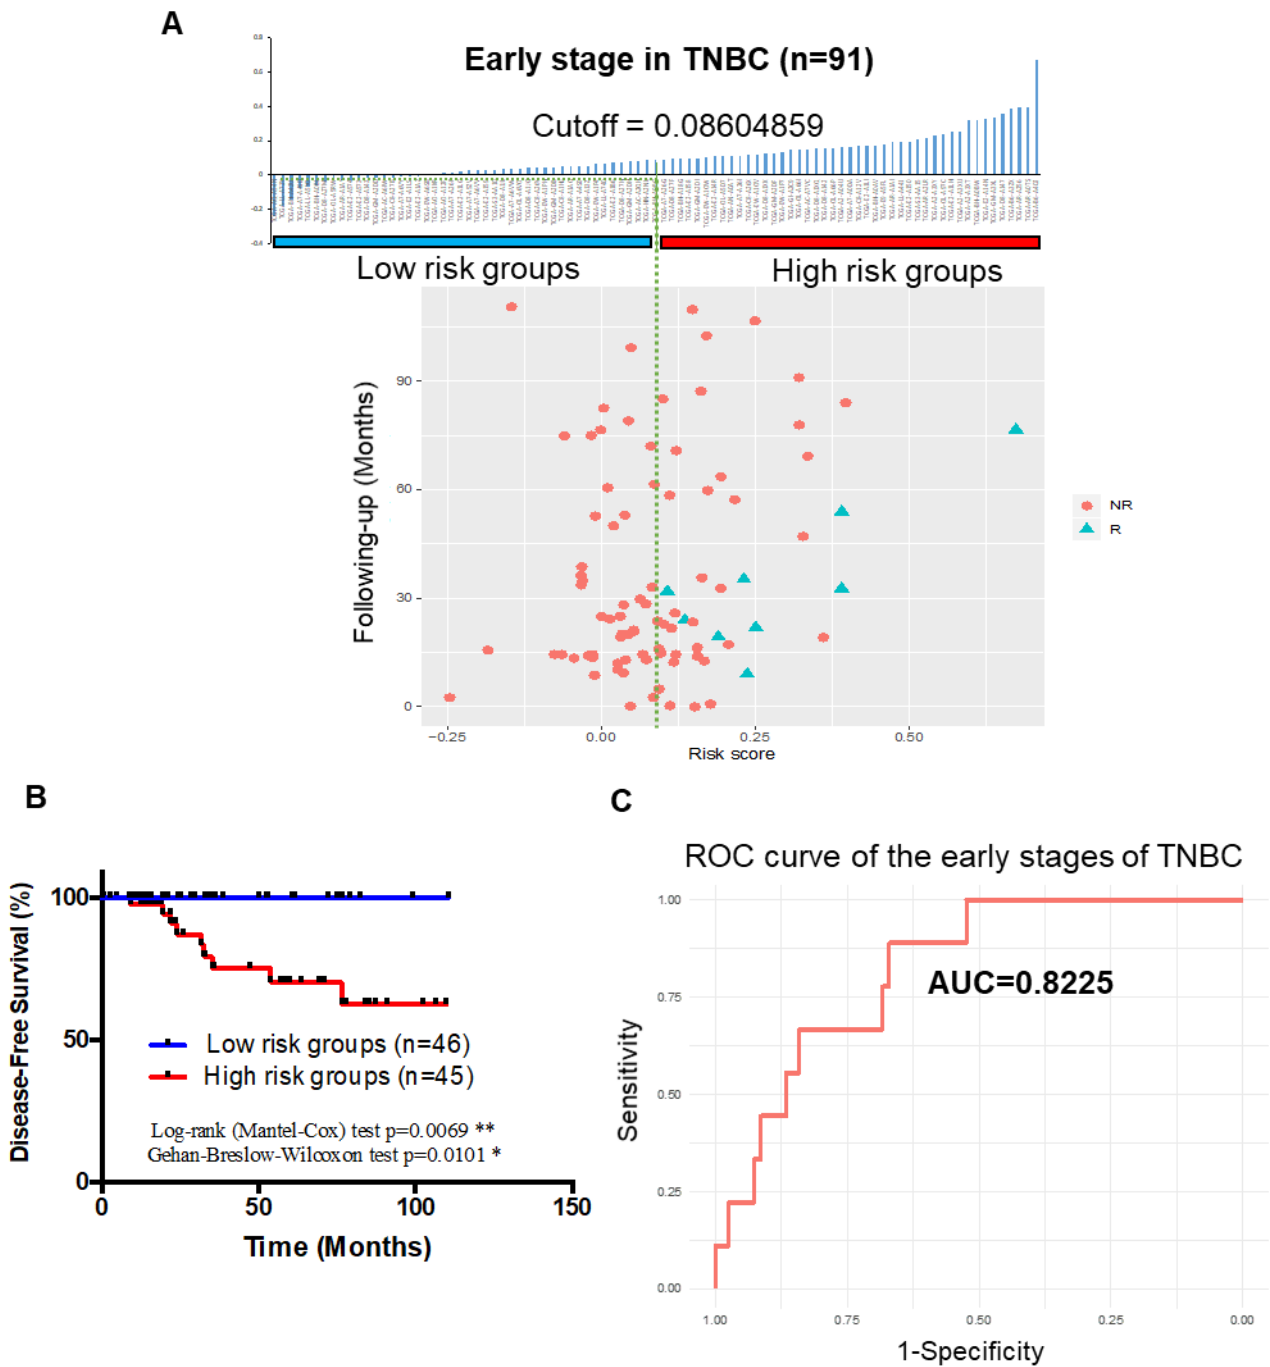

**Figure S2. Predictive value of the 8-miRNA signature for 91 patients with early-stage TNBC. (A)** The 8-miRNA signature risk score distribution and patient DFS. In the colorgram, the green line represents the median miRNA signature cutoff dividing patients into low- and high-risk groups. **(B)** Kaplan-Meier estimates of DFS in the training set. **(C)** ROC for TNBC recurrence by the 8-miRNA signature between patients with recurrence and without recurrence in the combined or respective miRNAs. The 8 combined miRNAs had the strongest predictive value in the early stage.

Figure S3.

A

Inflammatory regulation

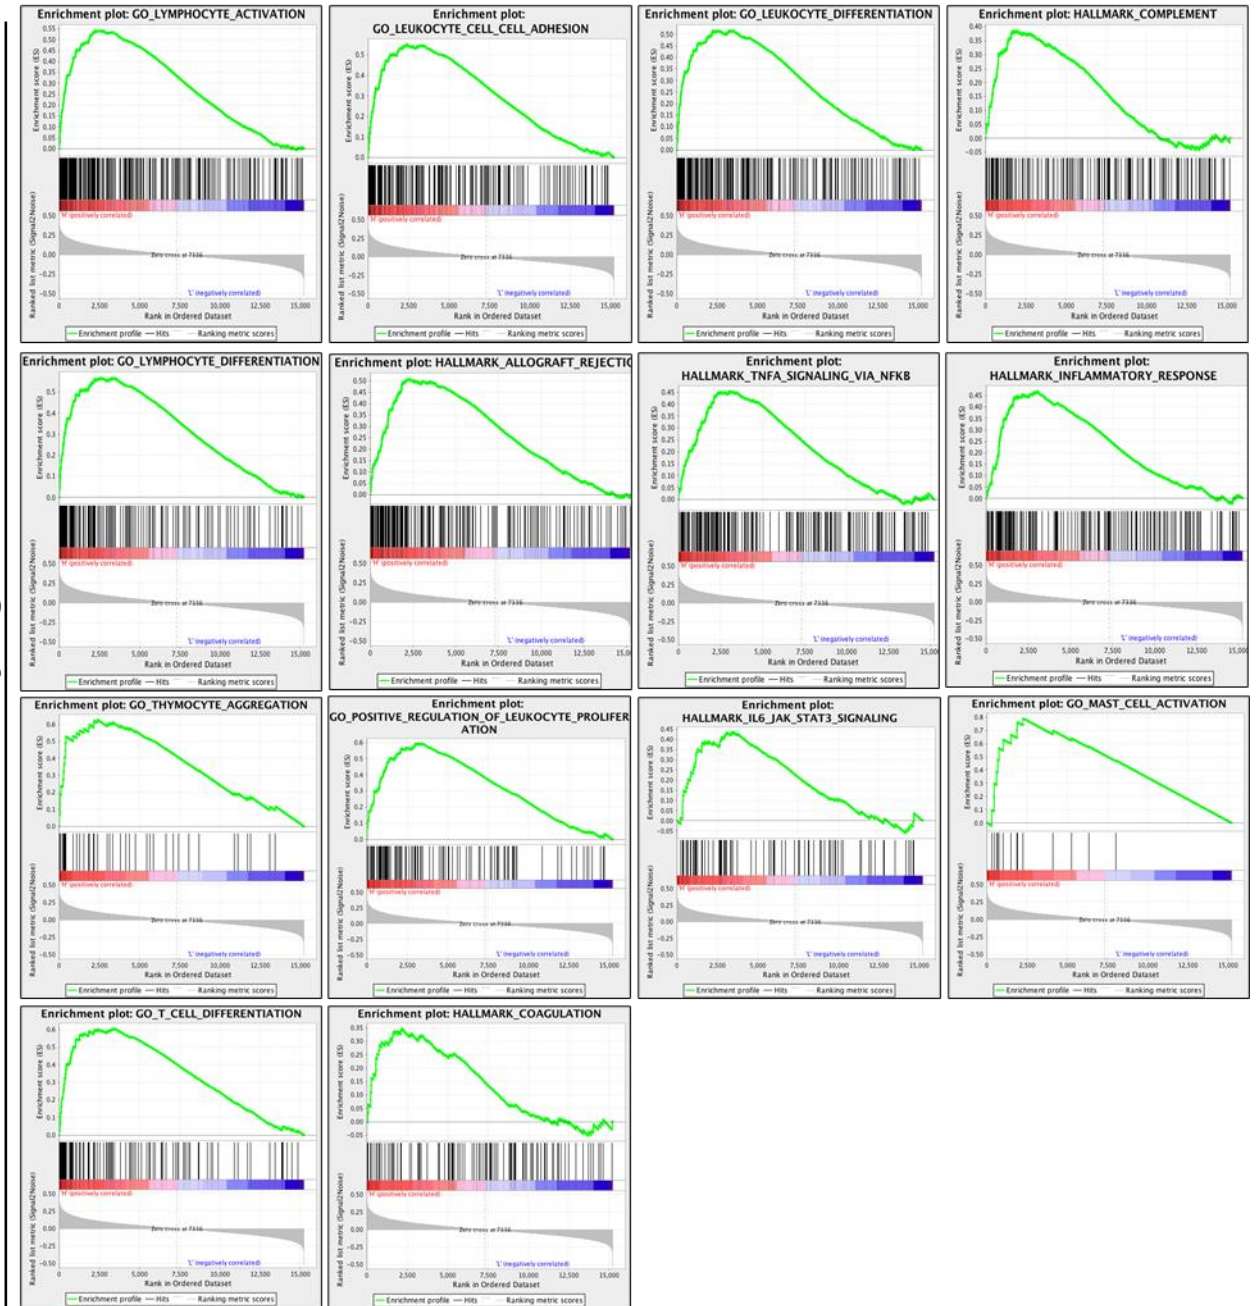

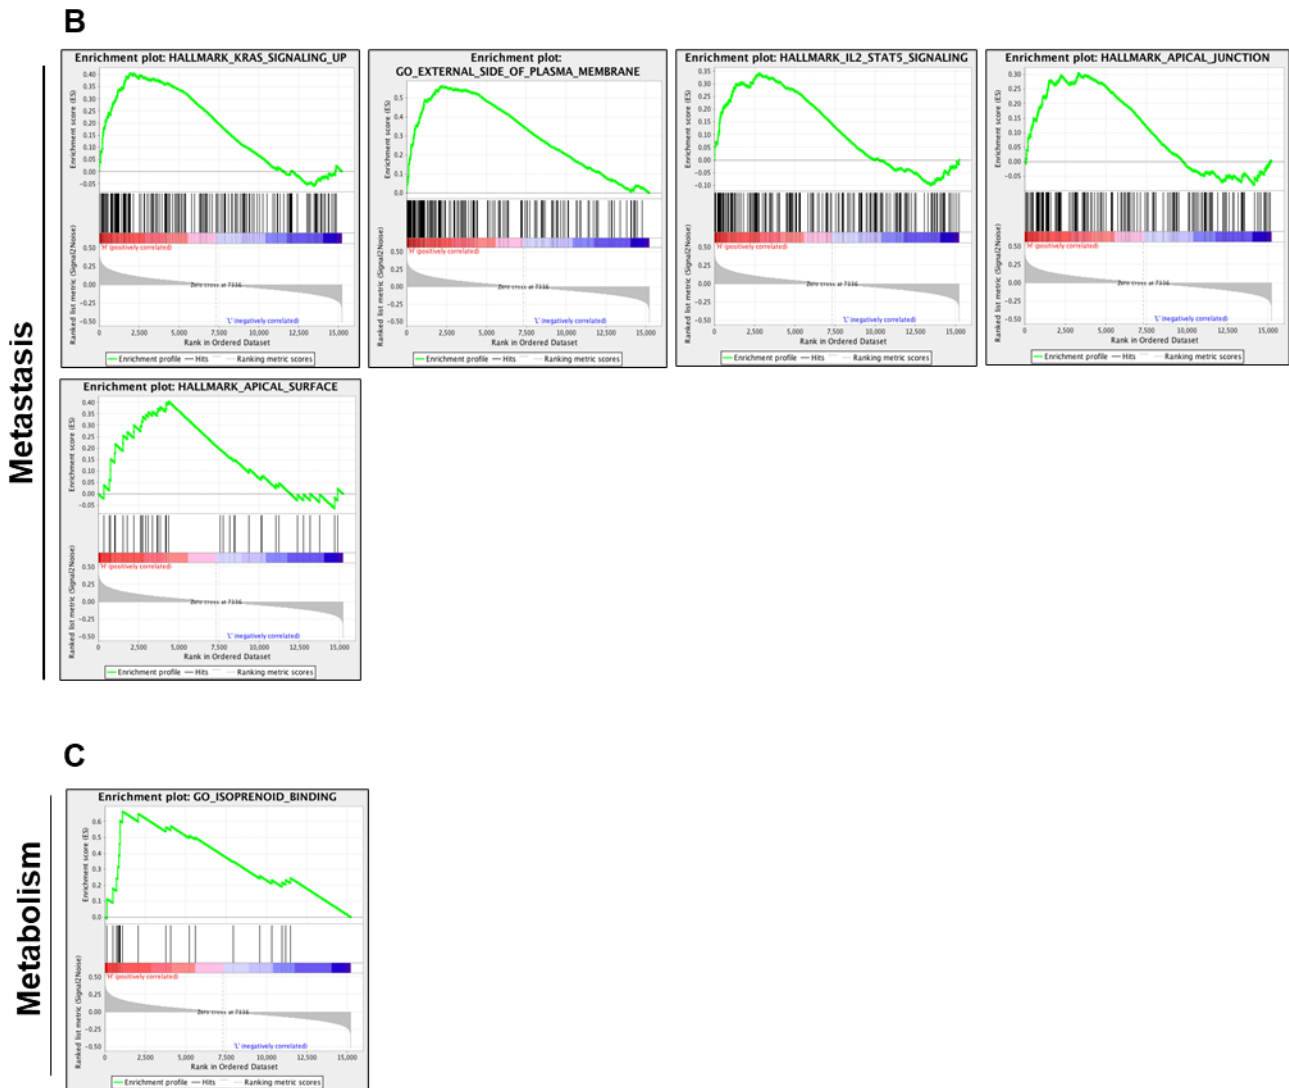

**Figure S3. Gene set enrichment analysis (GSEA) comparing the 8-miRNA signature low-risk groups (blue) against the high-risk groups (red) of TNBC patients in TCGA\_TNBC dataset. The high-risk groups correlated with inflammatory regulation (A) metastasis (B) and metabolism (C).**



**Figure S4.**

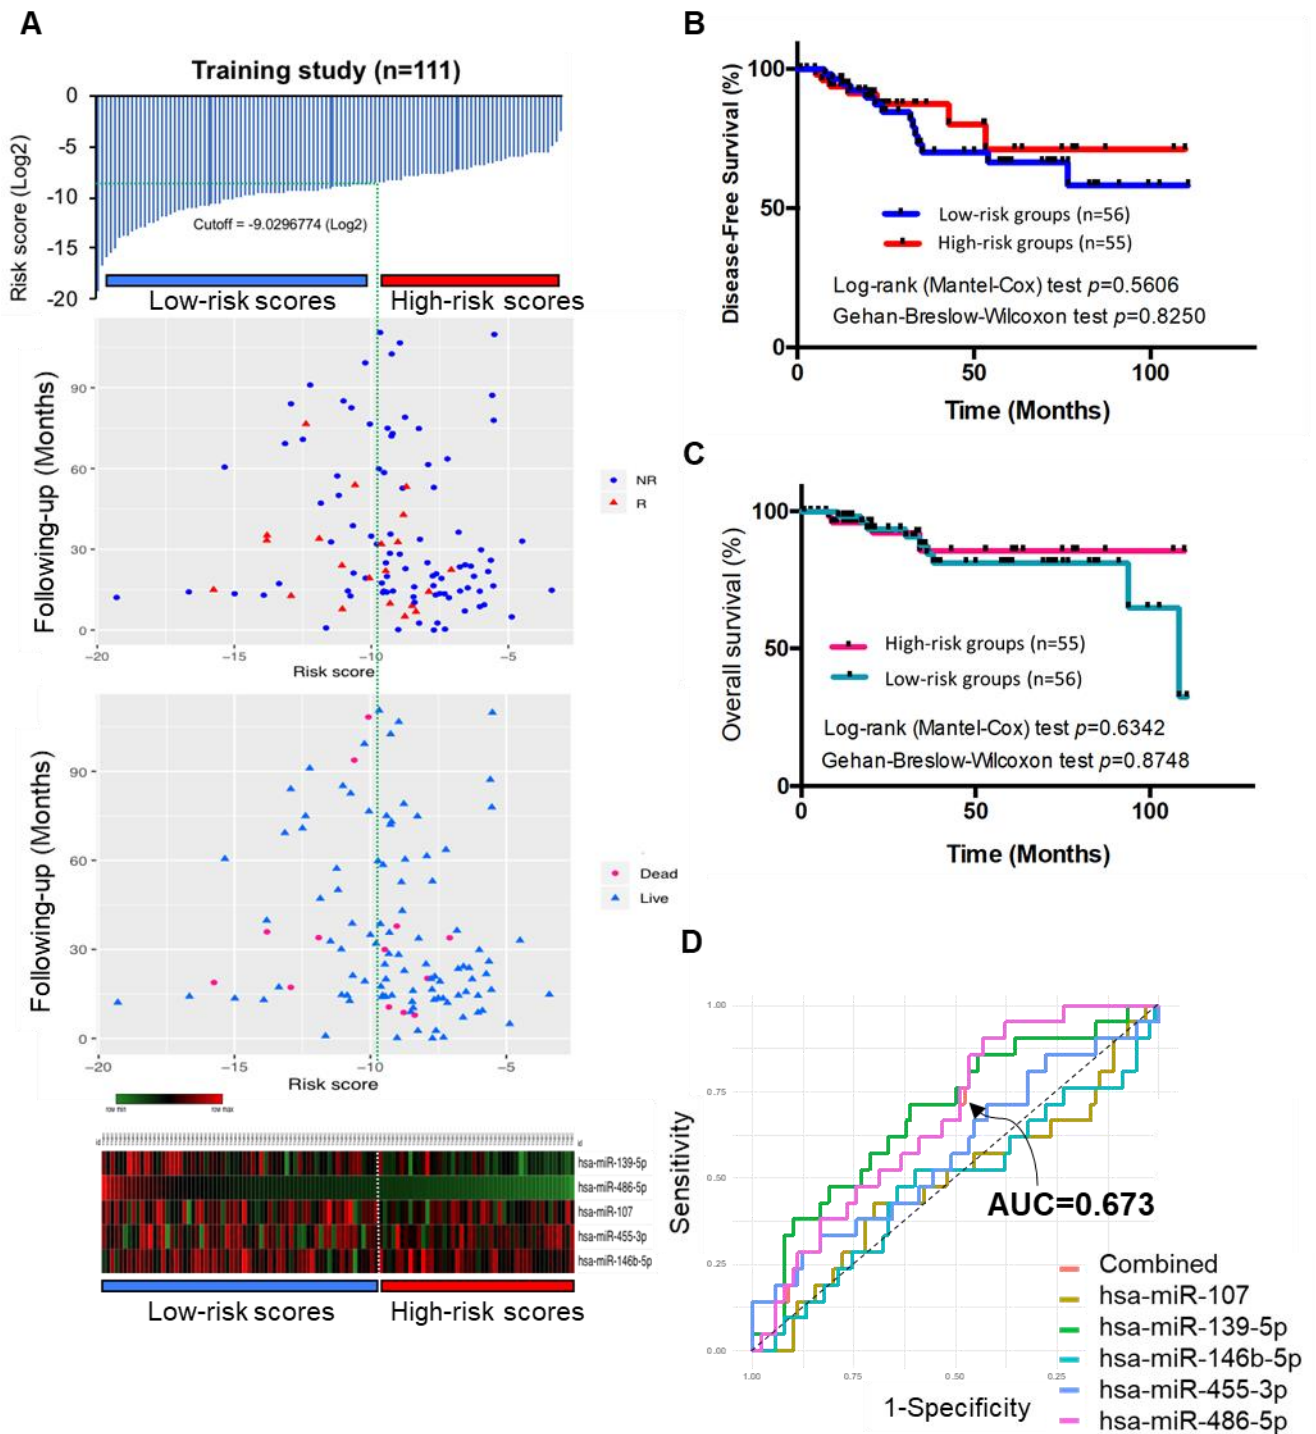

**Figure S4. Predictive value of the 5-miRNA signature for 111 TNBC patients. (A)** The 5-miRNA signature risk score distribution in the DFS and OS of TNBC patients. The colorgram of 5-miRNA expression profiles of high- and low-risk groups with TNBC. The green line represents the median miRNA signature cutoff dividing patients into low- and high-risk groups. **(B)** Kaplan-

Meier estimates of DFS in the training set. **(C)** Kaplan-Meier estimates of OS in the training set. **(D)** ROC for TNBC recurrence by the miRNA signature between patients with/without recurrence in the combined or respective miRNAs. The predictive value of the 5 combined miRNAs was no different than that of a single miRNA. The  $p$ -values were calculated using Log-rank and Gehan-Breslow-Wilcoxon tests. R: recurrence; NR: nonrecurrence.

**Figure S5.**

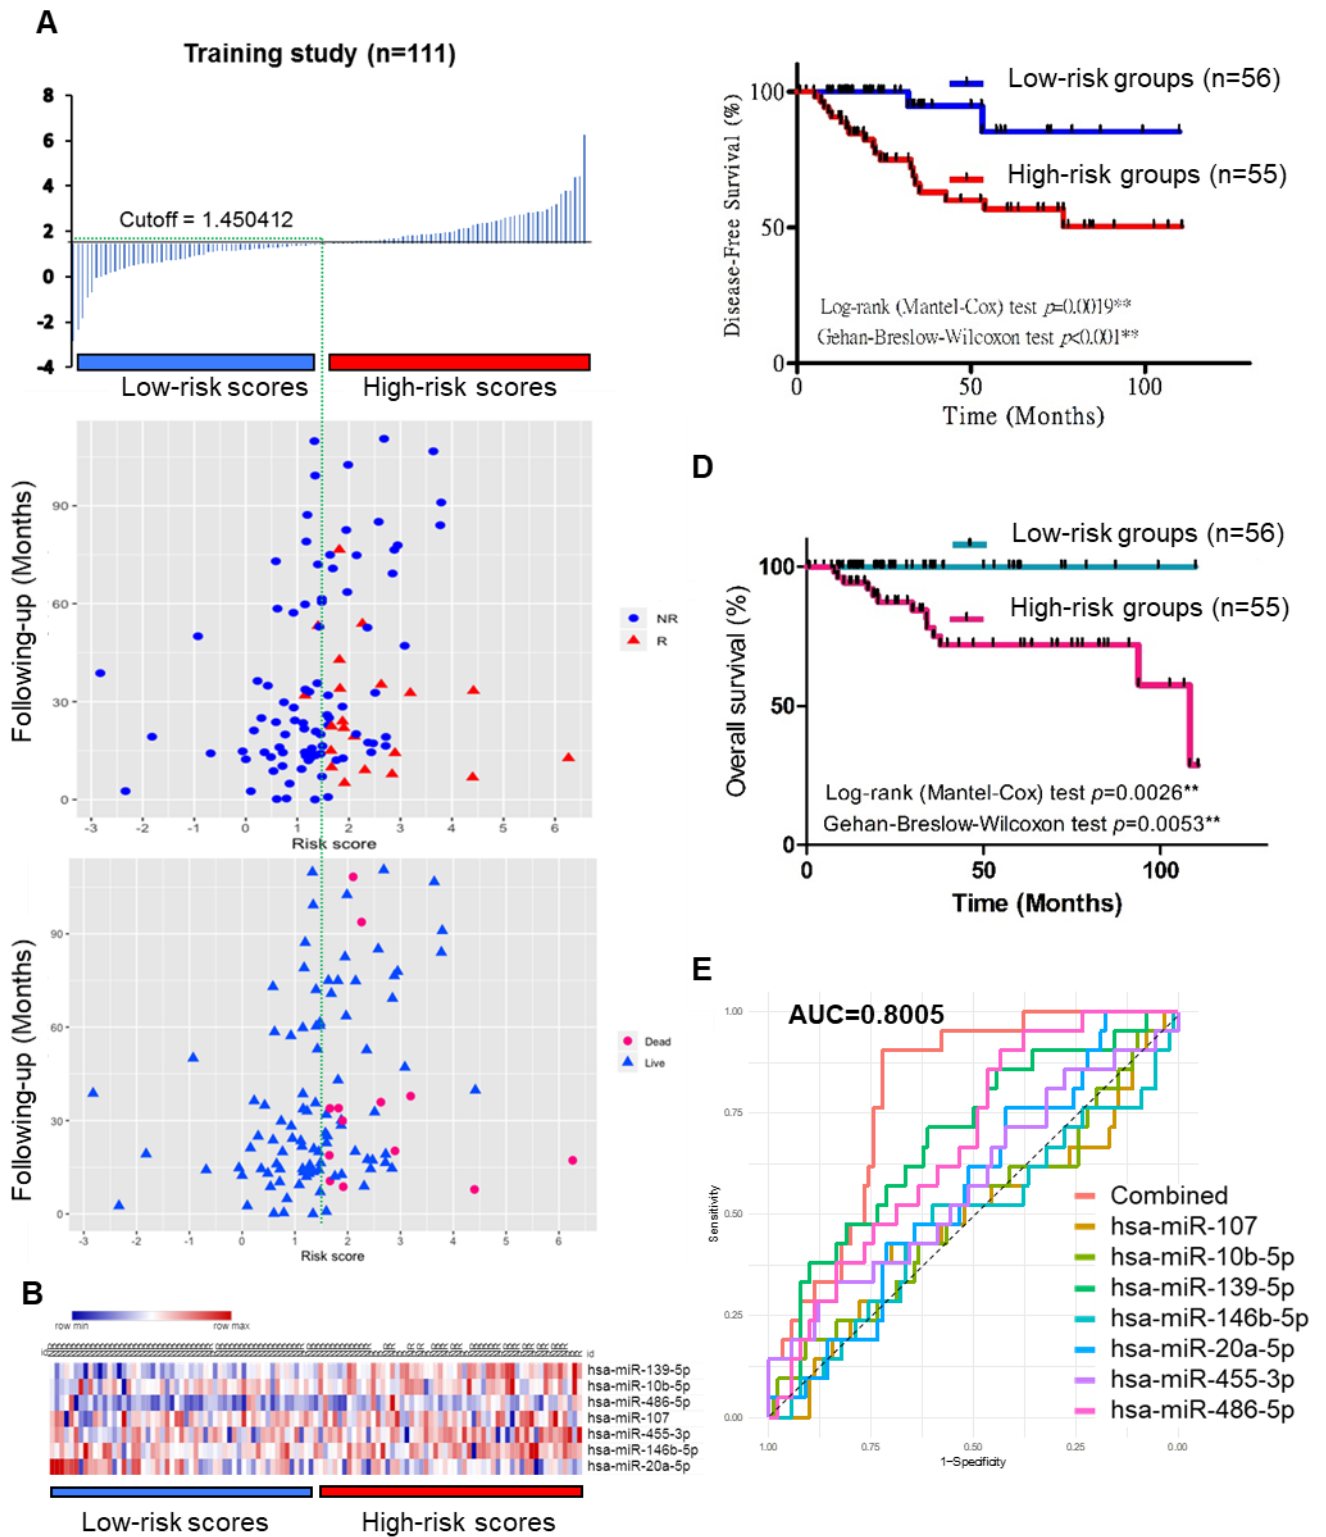

**Figure S5. Predictive value of the 7-miRNA signature for 111 TNBC patients. (A)** The 7-miRNA signature risk score distribution in DFS and OS of TNBC patients. The colorgram of 7-miRNA expression profiles of high- and low-

risk groups with TNBC. The green line represents the median miRNA signature cutoff dividing patients into the low- and high-risk groups. **(B)** The expression of heatmap in 8 miRNAs for 111 TNBC patients. **(C)** Kaplan-Meier estimates of DFS for the training set. **(D)** Kaplan-Meier estimates of OS for the training set. **(E)** ROC for TNBC recurrence by the miRNA signature between patients with/without recurrence in the combined or respective miRNAs. The 7 combined miRNAs had a stronger predictive value than a single miRNA. The p-values were calculated using Log-rank and Gehan-Breslow-Wilcoxon tests. R: recurrence; NR: nonrecurrence.

**Figure S6.**

**A Compared with the 4-miRNA signatures in 111 TNBC samples from TCGA**

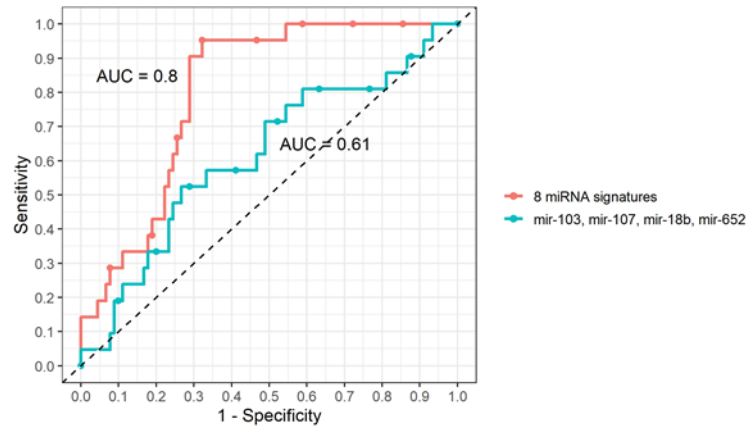

**B Compared with the 4-miRNA signatures in 36 TNBC samples from GSE19783 and E-MTAB-1989**

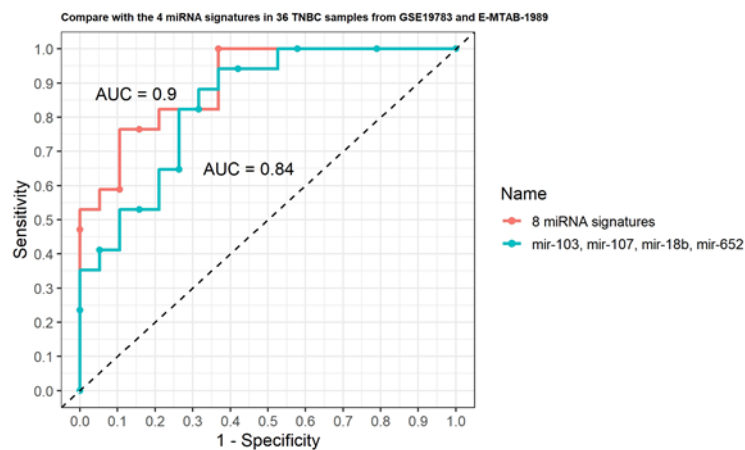

**Figure S6. ROC for TNBC patient recurrence by the 4-miRNA signature.**

The ROC curves generated using the prognosis and expression levels of the 4-miRNA signature were able to discriminate between patients with relapse in 111 patients in TCGA\_TNBC **(A)** and 36 patients in the E-MTAB-1989 and GSE19783 datasets **(B)**. The AUC values were 0.61 and 0.84 by the 4-miRNA signature.

Figure S7.

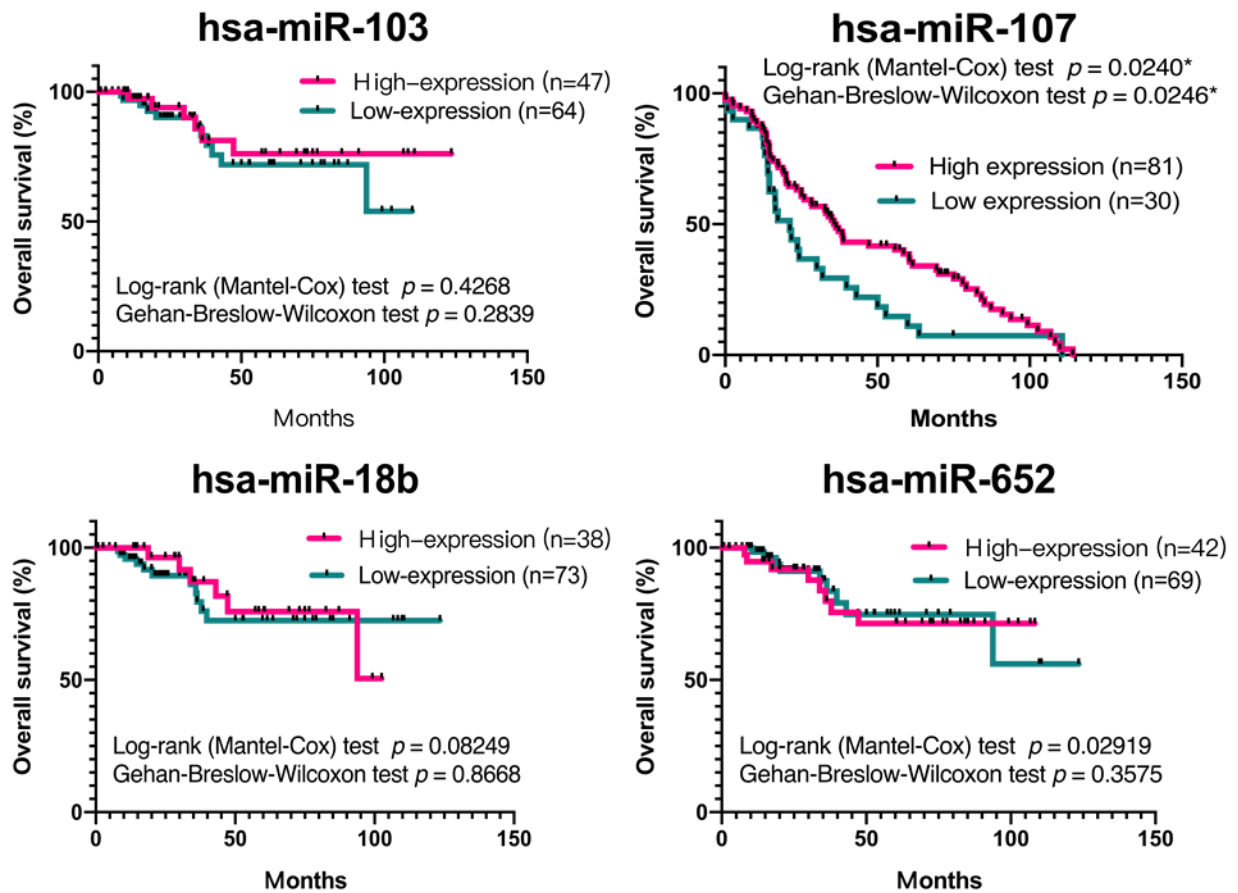

Figure S7. Kaplan-Meier survival analysis estimates the OS of TNBC patients according to the 4-miRNA expression profile. Relative levels of miR-18b, miR-103, miR-107, and miR-652 in 111 patients in TCGA\_TNBC with their survival times. The  $p$ -values were calculated using Log-rank and Gehan-Breslow-Wilcoxon tests.  $*p < 0.05$ .

Figure S8.

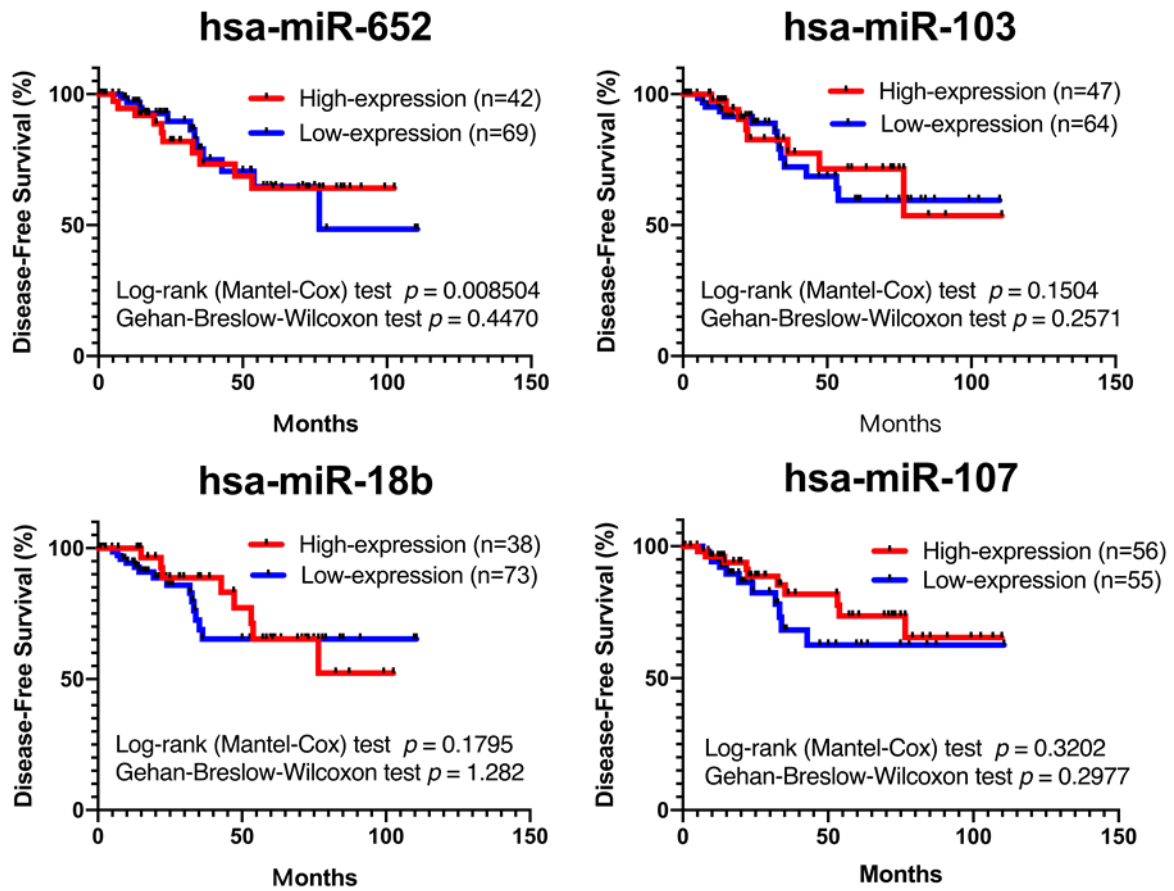

Figure S8. Kaplan-Meier survival analysis estimates DFS of TNBC patients according to the 4-miRNA expression profile. Relative levels of miR-18b, miR-103, miR-107, and miR-652 in 111 patients in TCGA\_TNBC with recurrence. The  $p$ -values were calculated using Log-rank and Gehan-Breslow-Wilcoxon tests.

**Figure S9.**

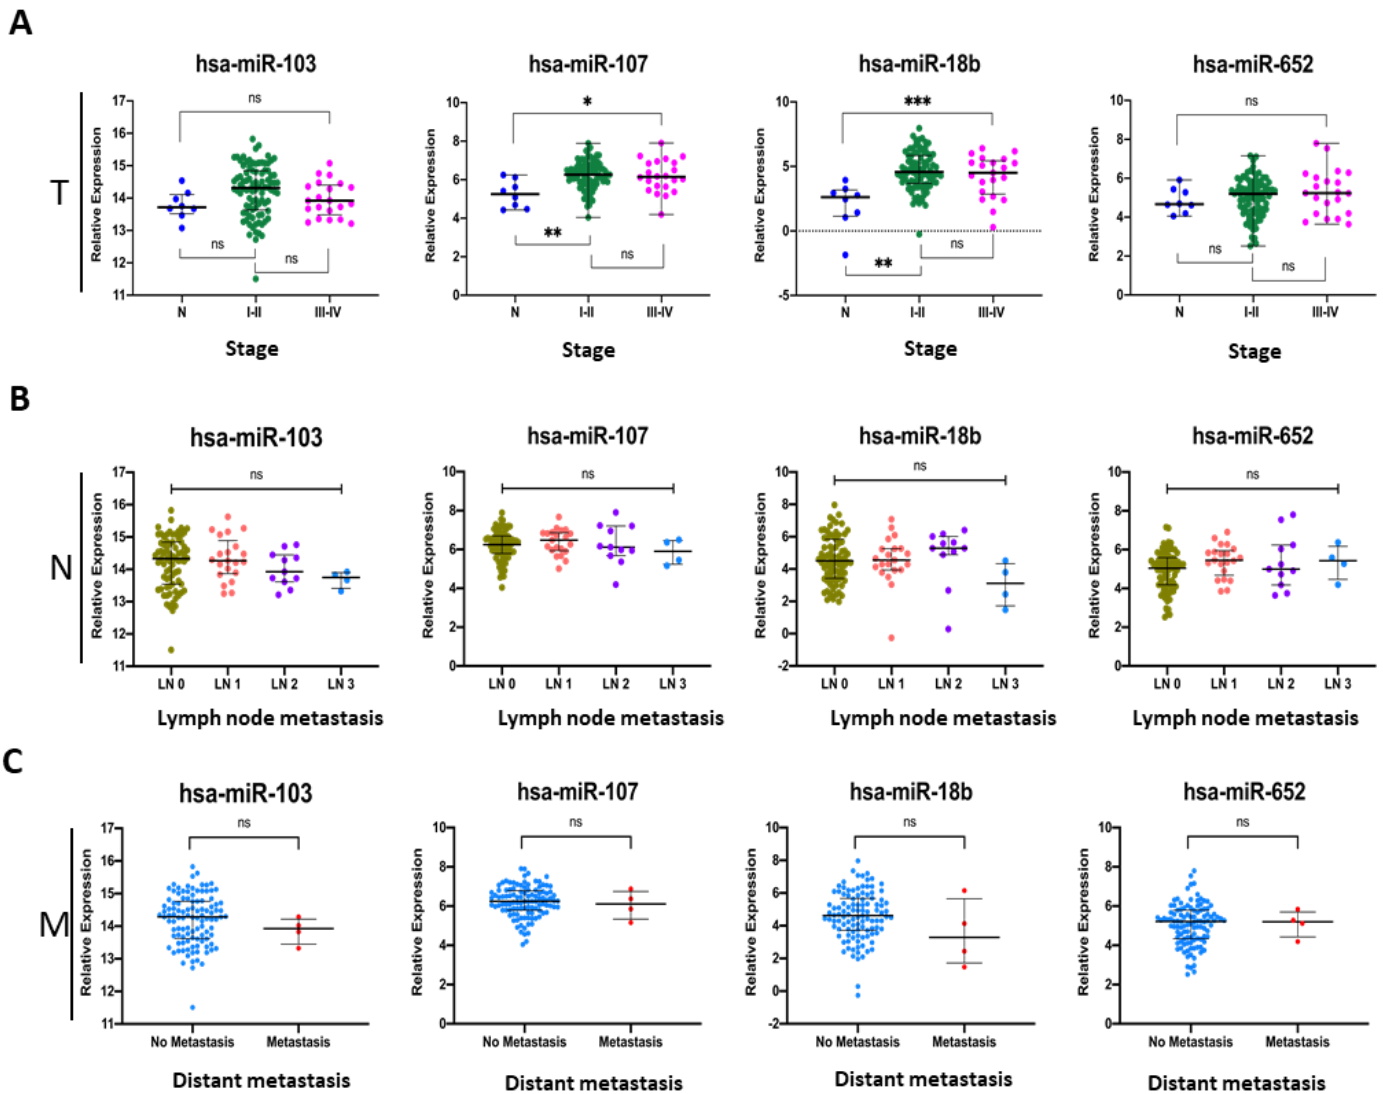

**Figure S9. The difference in the 4-miRNA expression profiles in subgroups divided by TNM classification. (A)** 111 TNBC patients with 8 N vs. 89 stage I-II vs. 22 stage III-IV. The  $p$ -values were calculated with TCGA\_TNBC. **(B)** The 111 TNBC patients with 74 LN0 vs. 21 LN1 vs. 12 LN2 vs. 4 LN3. The  $p$ -values were calculated with the Kruskal-Wallis test. **(C)** 111 TNBC patients with 107 no metastasis vs. 4 metastasis. The  $p$ -values were calculated using Student's t-test. \* $p < 0.05$ ; \*\* $p < 0.01$ ; \*\*\* $p < 0.0001$ ; ns is not significant. N: adjacent normal; T: tumor stage; LN: lymph node; M: metastasis.



Figure S10.

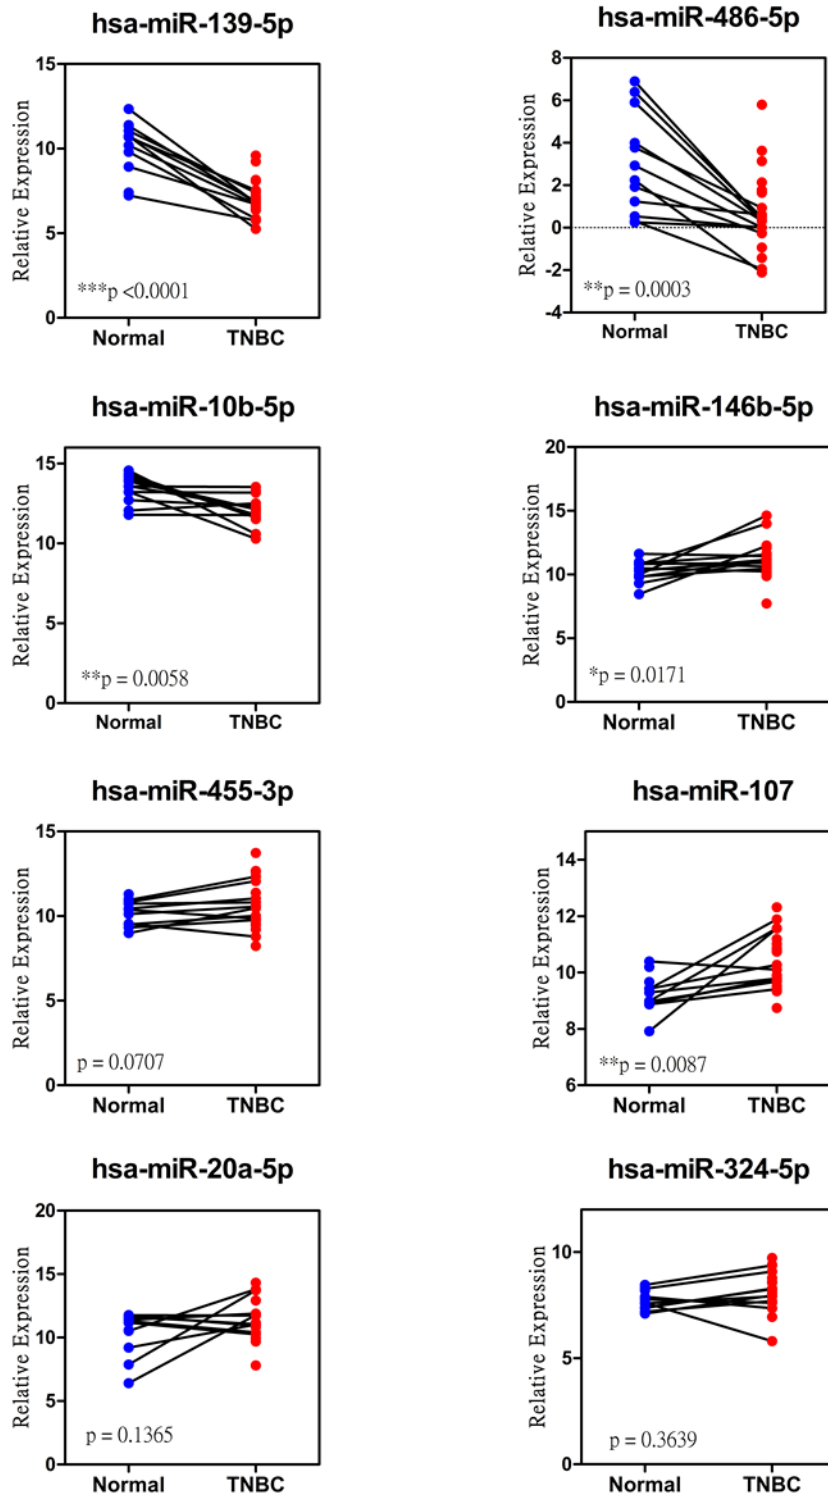

Figure S10. Analysis of the published GSE40049 dataset from clinical data. GSE40049 expression analysis of miR-139-5p, miR-107, miR-146b-5p, miR-142-3p, miR-17-5p, miR-455-3p, miR-324-5p, miR-486-5p, miR-10b-5p and

miR-20a-5p in 24 tumor and 14 adjacent normal tissues. The expression of miR-139-5p, miR-107, miR-146b-5p, miR-10b-5p and miR-486-5p was significantly ( $p<0.05$ ) higher in tumors than in adjacent normal tissues, while the expression of miR-142-3p, miR-17-5p, miR-455-3p, miR-324-5p and miR-20a-5p did not reach statistical significance. The differences between the paired samples were calculated with a Wilcoxon test. \* $p<0.05$ ; \*\* $p<0.01$ ; \*\*\* $p<0.0001$ .

## Supplementary References

1. Krishnan K, Steptoe AL, Martin HC, Pattabiraman DR, Nones K, Waddell N, et al. miR-139-5p is a regulator of metastatic pathways in breast cancer. *RNA (New York, NY)*. 2013; 19: 1767-80.
2. Yang F, Zhang W, Shen Y, Guan X. Identification of dysregulated microRNAs in triple-negative breast cancer (review). *Int J Oncol*. 2015; 46: 927-32.
3. Fkih M'hamed I, Privat M, Trimeche M, Penault-Llorca F, Bignon YJ, Kenani A. miR-10b, miR-26a, miR-146a And miR-153 Expression in Triple Negative Vs Non Triple Negative Breast Cancer: Potential Biomarkers. *Pathology oncology research : POR*. 2017; 23: 815-27.
4. Gupta I, Sareyeldin RM, Al-Hashimi I, Al-Thawadi HA, Al Farsi H, Vranic S, et al. Triple Negative Breast Cancer Profile, from Gene to microRNA, in Relation to Ethnicity. *Cancers (Basel)*. 2019; 11.
5. Ouyang M, Li Y, Ye S, Ma J, Lu L, Lv W, et al. MicroRNA profiling implies new markers of chemoresistance of triple-negative breast cancer. *PLoS one*. 2014; 9: e96228.
6. Turashvili G, Lightbody ED, Tyryshkin K, SenGupta SK, Elliott BE, Madarnas Y, et al. Novel prognostic and predictive microRNA targets for triple-negative breast cancer. *FASEB J*. 2018: fj201800120R.
7. Abdallah R, Youness R, El Meckawy N, El Sebaaei A, Abdelmotaal A, Assal R. 88P Crosstalk between hesperetin and miR-486-5p in triple-negative breast cancer (TNBC): An approach towards precision medicine. *Annals of Oncology*. 2018; 29: mdy314. 028.
8. Abdallah R, Youness R, El Meckawy N, El Sebaei A, Abdelmotaal A, Assal R. Paradoxical effects of miR-486-5p on the oncogenic and immunogenic profiles in triple negative breast cancer (TNBC). *European Journal of Cancer*. 2018; 92: S123.
9. Elkhoully A, Youness R, Gad MJAO. 172P miR-486-5p counteracts the shedding of MICA/B and CD155 immune-ligands in TNBC patients. 2019; 30: mdz450. 009.
10. Li XY, Luo QF, Wei CK, Li DF, Li J, Fang L. MiRNA-107 inhibits proliferation and migration by targeting CDK8 in breast cancer. *International journal of clinical and experimental medicine*. 2014; 7: 32-40.
11. Luo Z, Zheng Y, Zhang W. Pleiotropic functions of miR107 in cancer networks. *OncoTargets and therapy*. 2018; 11: 4113-24.
12. Shen S, Sun Q, Liang Z, Cui X, Ren X, Chen H, et al. A prognostic model of triple-negative breast cancer based on miR-27b-3p and node status. *PLoS One*. 2014; 9:

e100664.

13. Zhang L, Ma P, Sun LM, Han YC, Li BL, Mi XY, et al. MiR-107 down-regulates SIAH1 expression in human breast cancer cells and silencing of miR-107 inhibits tumor growth in a nude mouse model of triple-negative breast cancer. *Mol Carcinog.* 2016; 55: 768-77.
14. Li Z, Meng Q, Pan A, Wu X, Cui J, Wang Y, et al. MicroRNA-455-3p promotes invasion and migration in triple negative breast cancer by targeting tumor suppressor E124. *Oncotarget.* 2017; 8: 19455-66.
15. Garcia AI, Buisson M, Bertrand P, Rimokh R, Rouleau E, Lopez BS, et al. Down-regulation of BRCA1 expression by miR-146a and miR-146b-5p in triple negative sporadic breast cancers. *EMBO molecular medicine.* 2011; 3: 279-90.
16. Jin L, Lim M, Zhao S, Sano Y, Simone BA, Savage JE, et al. The metastatic potential of triple-negative breast cancer is decreased via caloric restriction-mediated reduction of the miR-17~92 cluster. *Breast cancer research and treatment.* 2014; 146: 41-50.
17. Li X, Wu B, Chen L, Ju Y, Li C, Meng S. Urokinase-type plasminogen activator receptor inhibits apoptosis in triple-negative breast cancer through miR-17/20a suppression of death receptors 4 and 5. *Oncotarget.* 2017; 8: 88645-57.
18. El Majzoub R, Fayyad-Kazan M, Nasr El Dine A, Makki R, Hamade E, Gree R, et al. A thiosemicarbazone derivative induces triple negative breast cancer cell apoptosis: possible role of miRNA-125a-5p and miRNA-181a-5p. *Genes & genomics.* 2019; 41: 1431-43.
